# Supplementary material
Source: PubMed Central journal article supplement (PMC3026740)
Supplement: JCI45364sd.pdf [file JCI45364sd.pdf]

**Supplementary Table I**

**Published Clinical Trials in HD.**

| Molecule/Target        | Sponsor                | Status      |
|------------------------|------------------------|-------------|
| ACR16                  | Neurosearch            | Phase III   |
| AFQ056 - mGluR5        | Novartis               | Phase II    |
| Atomoxetine            | U. of Iowa             | Phase II    |
| Citalopram             | NINDS                  | Phase II    |
| CoQ10                  | NINDS                  | Phase III   |
| Creatine               | NCCAM/U. Rochester     | Phase III   |
| Dimebon                | Medivation Inc.        | Phase III   |
| GDNF                   | Ceregene               | Preclinical |
| HDAC4 inhibition       | CHDI Foundation        | Preclinical |
| Huntingtin ASO         | ISIS Pharmaceuticals   | Preclinical |
| Huntingtin siRNA       | Alnylam                | Preclinical |
| Improved CoQ10         | Edison Pharmaceuticals | Preclinical |
| JNK3 inhibition        | CHDI Foundation        | Preclinical |
| KMO inhibition         | CHDI Foundation        | Preclinical |
| Lithium and Divalproex | NINDS                  | Phase II    |
| LNK-XXX                | Link Medicine          | Preclinical |
| Memantine              | UCSD                   | Phase IV    |
| PDE inhibition         | CHDI Foundation        | Preclinical |
| PDHK inhibition        | CHDI Foundation        | Preclinical |
| Sirtuin-1 activation   | CHDI Foundation        | Preclinical |
| Sirtuin-1 inhibition   | Siena Biotech          | Phase I     |
| TG2 inhibition         | CHDI Foundation        | Preclinical |
| TrkB modulation        | CHDI Foundation        | Preclinical |

**Supplementary Table II.**

**Published Pharmacological Studies in HD rodent models**

| Drug name                   | Summary                                                                                                                                                                                                                                            | pmid     |
|-----------------------------|----------------------------------------------------------------------------------------------------------------------------------------------------------------------------------------------------------------------------------------------------|----------|
| Amantadine                  | Possible efficacy for dyskinesia.                                                                                                                                                                                                                  | 15178736 |
| Amantadine                  | A letter on a small trial showed modest behavioral benefits but not dyskinesia. Previous study's authors responded.                                                                                                                                | 15304616 |
| Amantadine                  | Amantadine 300 mg/day had no effect on chorea or other symptoms                                                                                                                                                                                    | 12873857 |
| Amantadine                  | Double-blind placebo-controlled crossover study of amantadine shows improvement in extremity chorea                                                                                                                                                | 12221159 |
| Apomorphine                 | 5 d continuous infusion of apomorphine in 4 patients who responded acutely to treatment showed improved UHDRS motor section; and AIMS (abnormal involuntary movement scale).                                                                       | 17894335 |
| Aripiprazole                | Improved UHDRS score after two weeks of 10mg per day treatment.                                                                                                                                                                                    | 18765501 |
| Aripiprazole                | Aripiprazole in the treatment of Huntington's disease: a case series.                                                                                                                                                                              | 19557093 |
| Aripiprazole                | Treatment of the symptoms of Huntington's disease: preliminary results comparing aripiprazole and tetrabenazine.                                                                                                                                   | 19170197 |
| Atomoxetine                 | Randomized controlled trial of atomoxetine for cognitive dysfunction in early Huntington disease                                                                                                                                                   | 19745649 |
| Botulinum toxin-A           | Effective treatment of bruxism in a single female patient with botulinum toxin-A.                                                                                                                                                                  | 15377749 |
| Cabergoline                 | Cabergoline improved UHDRS after 1 wk of 2mg/day.                                                                                                                                                                                                  | 16629775 |
| Cannabidiol                 | Study shows no efficacy of cannabidiol at 700 mg/day for 6 weeks in 15 HD patients                                                                                                                                                                 | 1839644  |
| CNTF                        | Tolerability study in HD patients with encapsulated cells secreting CNTF                                                                                                                                                                           | 15585112 |
| Creatine                    | Creatine reduced the elevated 8OH2'dG in serum.                                                                                                                                                                                                    | 16434666 |
| Cyproterone acetate         | 50 mg per day eliminated hypersexuality in an elderly patient.                                                                                                                                                                                     | 18691628 |
| Cysteamine                  | Dose finding study of cysteamine in HD patients.                                                                                                                                                                                                   | 16258942 |
| Donepezil                   | Donepezil was not effective in a 30 patient study.                                                                                                                                                                                                 | 17030764 |
| Ethyl-eicosapentaenoic acid | Randomized controlled trial of ethyl-eicosapentaenoic acid in Huntington disease: the TREND-HD study.                                                                                                                                              | 19064745 |
| Ethyl-eicosapentaenoic acid | MRI study monitoring effects of ethyl-EPA in cerebral atrophy. Shows benefits in thalamus and caudate                                                                                                                                              | 18831882 |
| Ethyl-eicosapentaenoic acid | Imaging of 34 stage I or II HD patients in an ethyl-EPA trial showed that with a two time-point brain volume changes there is a significant group-level reductions in brain atrophy in the head of the caudate nucleus and the posterior thalamus. | 18831882 |
| Fluoxetine                  | Randomized, double-blind, placebo-controlled trial of this medication in nondepressed HD patients. Fluoxetine did not have an effect on non-depressed HD patients although it might be exert antidepressant effects in depressed HD patients.      | 9159735  |
| Galantamine                 | A patient whose motor and psychiatric symptoms improved after administration of galantamine, an acetylcholinesterase inhibitor.                                                                                                                    | 15101572 |
| Gamma-Acetylenic GABA       | A 14 HD patient study with gamma-Acetylenic GABA, an irreversible inhibitor of gamma-aminobutyric acid transaminase showed no benefit. CSF evaluation showed elevation of GABA in 10 subjects.                                                     | 6258106  |

|                  |                                                                                                                                                                                                                                                                                                  |          |
|------------------|--------------------------------------------------------------------------------------------------------------------------------------------------------------------------------------------------------------------------------------------------------------------------------------------------|----------|
| Gamma-vinyl GABA | A 6 HD patient study with gamma-vinyl GABA (2 g/day) revealed no effects in HD symptoms                                                                                                                                                                                                          | 6228746  |
| Idebenone        | A one-year, double-blind, parallel-group study in 100 HD patients demonstrated no effects of idebenone.                                                                                                                                                                                          | 8866496  |
| Ketamine         | Ketamine was well tolerated at low and intermediate subanesthetic doses in 10 HD patients. Intermediate ketamine doses produced specific decline in memory and verbal fluency. Higher subanesthetic doses caused a significant increase in psychiatric symptoms and impairment of eye movements. | 9222184  |
| Lamotrigine      | Lamotrigine improved motor and mood swing in single patient.                                                                                                                                                                                                                                     | 17853293 |
| Levetiracetam    | Levetiracetam reduced involuntary movements.                                                                                                                                                                                                                                                     | 16340384 |
| Lithium          | No effects of lithium in a 6 HD patient study.                                                                                                                                                                                                                                                   | 143188   |
| Memantine        | 20 mg daily dose of memantine in 12 patients significantly improved motor symptoms, powered by improved chorea, but failed to improve patient's cognitive, behavioral, functional, or independence ratings. Most patients tolerated memantine without side effects.                              | 17046312 |
| Memantine        | Possible slower progression in 27 patients.                                                                                                                                                                                                                                                      | 15354397 |
| Methylphenidate  | Methylphenidate worsened symptoms of juvenile HD.                                                                                                                                                                                                                                                | 18658080 |
| Minocycline      | Minocycline produced benefits in motor and psychiatric endpoints.                                                                                                                                                                                                                                | 15486519 |
| Minocycline      | Safety trial showed tolerability and safety over 8 wks.                                                                                                                                                                                                                                          | 15304592 |
| Minocycline      | Safety trial showed tolerability and safety over 6 months.                                                                                                                                                                                                                                       | 15197710 |
| Modafinil        | Modafinil increased alertness in a 20 patient trial but had no effect on cognitive functions or mood, and had deleterious effects on visual recognition and working memory.                                                                                                                      | 18516718 |
| Muscimol         | Muscimol, a GABA receptor agonist, treatment did not result in improvement in 10 HD patients' motor or cognitive function.                                                                                                                                                                       | 152602   |
| Nabilone         | Nabilone improved mood and behavior, and reduced chorea, of patient.                                                                                                                                                                                                                             | 17135385 |
| Nabilone         | 44 patients in cross-over design to inform design of future studies; no major adverse events were found; no significant change in primary outcome measures of UHDRS found.                                                                                                                       | 19845035 |
| Nabilone         | Nabilone increased chorea symptoms.                                                                                                                                                                                                                                                              | 10584686 |
| Olanzapine       | Low dose in a single patient improved in motor, psychiatric and activity of daily living symptoms after four months of treatment.                                                                                                                                                                | 15608976 |
| Olanzapine       | Open label study to assess effects on motor symptoms. Study shows efficacy in most motor subscores.                                                                                                                                                                                              | 12410058 |
| OPC-14117        | The free-radical scavenger OPC-14117 showed no effects in symptoms severity but increased liver transaminase levels.                                                                                                                                                                             | 9595988  |
| Perospirone      | Improved motor and cognitive symptoms.                                                                                                                                                                                                                                                           | 16887250 |
| Proglumide       | Proglumide, a cholecystokinin receptor antagonist, had no effects in 8 HD patients                                                                                                                                                                                                               | 8591802  |
| Quetiapine       | Case report of patient subjectively feeling better with quetiapine than olanzapine.                                                                                                                                                                                                              | 15283541 |
| Quetiapine       | Quetiapine improved behavioral symptoms.                                                                                                                                                                                                                                                         | 16384811 |

|                        |                                                                                                                                                                                                                                                                                      |          |
|------------------------|--------------------------------------------------------------------------------------------------------------------------------------------------------------------------------------------------------------------------------------------------------------------------------------|----------|
| Ramecide hydrochloride | No effects of this NMDA receptor antagonist in 31 HD patients (200 or 600 mg/day)                                                                                                                                                                                                    | 8723144  |
| Resveratrol            | Resveratrol improved peripheral glucose levels in N171-Q82 but had no effect on survival, motor or cognitive endpoints.                                                                                                                                                              | 20561979 |
| Riluzole               | Riluzole not effective in treating HD.                                                                                                                                                                                                                                               | 17702031 |
| Riluzole               | Riluzole protects Huntington disease patients from brain glucose hypometabolism and grey matter volume loss and increases production of neurotrophins.                                                                                                                               | 19280185 |
| Riluzole               | Riluzole improves chorea intensity without effects in other endpoints                                                                                                                                                                                                                | 14663041 |
| Riluzole               | Riluzole showed effects at 3 months on motor scores, but not at 12 months in an open label study (50 mg twice a day)                                                                                                                                                                 | 11697523 |
| Risperidone            | Patients taking risperidone demonstrated significantly improved psychiatric functioning and motor stabilization, whereas patients not taking risperidone were stable psychiatrically and worsened motorically.                                                                       | 18297579 |
| Rivastigmine           | Treatment with 6mg rivastigmine for 2 years improved motor score and trend in reduction of functional disability and cognitive impairment.                                                                                                                                           | 17272969 |
| Rivastigmine           | Slight effect on cognitive and motor symptoms found.                                                                                                                                                                                                                                 | 15390067 |
| Sodium phenylbutyrate  | Doses of 12-15 g per day of phenylbutyrate well-tolerated in patients.                                                                                                                                                                                                               | 17702032 |
| Sulpiride              | Sulpiride, a dopamine receptor antagonist, did not affect symptoms in 11 HD patients even though it lowered total dyskinesia scores                                                                                                                                                  | 6236286  |
| Terguride              | No effects of terguride, a partial dopamine receptor agonis, in 8 HD patients                                                                                                                                                                                                        | 2575450  |
| Tetrabenazine          | Tetrabenazine reduced chorea for 5hrs in short term study of 10 patients.                                                                                                                                                                                                            | 17078062 |
| Tetrabenazine          | TBZ effectively suppresses HD-related chorea for up to 80 weeks. Patients treated chronically with TBZ should be monitored for parkinsonism, dysphagia and other side effects including sleep disturbance, depression, anxiety, and akathisia.                                       | 20021666 |
| Tetrabenazine          | 84 patients studied, TBZ reduced chorea severityon UHDRS; improved CGI-I scale, compared to placebo.                                                                                                                                                                                 | 16858878 |
| Tetrabenazine          | TBZ is a moderately effective treatment of a large variety of hyperkinetic movement disorders, with excellent effects in a subgroup with chorea and facial dystonia/dyskinesias.                                                                                                     | 15602104 |
| Tetrabenazine          | Treatment of the symptoms of Huntington's disease: preliminary results comparing aripiprazole and tetrabenazine.                                                                                                                                                                     | 19170197 |
| Tiapride               | Tiapride, a dopamine receptor antagonist, treatment significantly improved choreatic movements and motor skills in a 29 HD patient study.                                                                                                                                            | 6241563  |
| Valproate              | Valproic acid has benefit for HD patients with myoclonic hyperkinesia.                                                                                                                                                                                                               | 16507108 |
| Venlafaxine XR         | After 4 weeks of venlafaxine XR treatment (75, 150 or 225 mg), the symptoms of depression in HD patients decreased significantly relative to baseline. However, approximately one in five patients developed significant venlafaxine-related side effects (nausea and irritability). | 19996754 |

**Supplementary Table III.**

**Genetic approaches for disease modification in rodent models of HD.**

| Gene Symbol | Human Gene_ID | Summary Comments                                                                                                                                                                            | Pmid        |
|-------------|---------------|---------------------------------------------------------------------------------------------------------------------------------------------------------------------------------------------|-------------|
| ACCN2       | 41            | siRNA KD reduced mhtt aggregation and induced UPS in culture and in vivo.                                                                                                                   | 18658163    |
| CBP         | 1387          | Heterozygote CBP knockout crossed to the N171-82Q model decreased their lifespan with no effect on motor function, neurodegeneration or aggregation.                                        | 20448484    |
| CNR2        | 1269          | KO of CB2 enhanced microglial activation, worsened disease symptomatology and reduced mice lifespan in R6.2 mice.                                                                           | 19805493    |
| BAG1        | 573           | BAG1 overexpression in N171-82Q improved rotarod but only in male mice. OE in PC12 augmented the effects of Hsp70 by reducing aggregation and improving neurite outgrowth.                  | 18400759    |
| BDNF        | 627           | Reduction in BDNF in R6/1 had no effect on mhtt aggregates, but worsened motor and neuropathology. Loss reversed by intrastriatal BDNF.                                                     | 15342740    |
| BDNF        | 627           | BDNF +/- crossed to R6/1 showed worsened locomotor activity induced by amphetamine but not by apomorphine; also worsened the nigral-striatal transport, and increased aggregation in nigra. | 15934928    |
| BDNF        | 627           | R6/1:BDNF +/- mice showed earlier and worsened cognitive impairment than R6/1.                                                                                                              | 19121372    |
| BDNF        | 627           | Overexpression in forebrain improved motor, brain atrophy and inclusion outcomes. Increased ENK, DARPP32.                                                                                   | 18086127    |
| BDNF        | 627           | BDNF and Noggin together induced striatal neuronal regeneration, delayed motor impairment, and extended survival in R6/2 mice.                                                              | 17885687    |
| CALM1       | 801           | AAV CaM-fragment into R6/2 striatum improved motor and body wt.                                                                                                                             | 19759302    |
| CASP1       | 834           | Two experiments done in R6/2 mouse model. Both dominant negative of CASP1 and CASP small molecule inhibitor decreased aggregation, improved motor/behavior, and increased lifespan.         | 10353249    |
| CASP3       | 836           | YAC128 mice expressing mutant htt, resistant to cleavage by caspase-3, showed no effects on the HD phenotypes.                                                                              | 16777606    |
| CASP6       | 839           | YAC128 mice resistant to caspase-6 but not caspase-3, maintain normal phenotypes and protected from toxicity of multiple stressors (NMDA, QA, and staurosporine).                           | 16777606    |
| CLPB        | 81570         | Transgenic of yeast Hsp104 crossed to N171-82Q HD decreased aggregation and increased survival but had no effect on motor or body wt.                                                       | 16204350    |
| CNR2        | 1269          | CB2 KO in R6/2 enhanced microglial activation, worsened motor, neuropath and lifespan.                                                                                                      | 19805493    |
| CNTF        | 1270          | CNTF gene therapy in YAC72 model showed reduction of hyperactivity, but no effect in clasping and rotarod. Ambiguous neurodegeneration changes (reduced striatal "dark cells").             | 14697316    |
| CPLX2       | 10814         | R6/2 phenotypes not affected by complexin II KO.                                                                                                                                            | 17352934    |
| CREB1       | 1385          | Transgenic A-CREB (loss of function CREB), when crossed to YAC128, significantly accelerated motor impairment.                                                                              | 19632326    |
| DYNC1H1     | 1778          | Dynein inhibitor EHNA increased mhtt aggregation toxicity. Partial LOF worsened fly eye phenotype. DYNC1H1 +/- crossed to N171-82Q worsened motor, survival; aggregation.                   | 15980862    |
| GDNF        | 2668          | GDNF gene therapy in mouse R6/2 model shows no benefits.                                                                                                                                    | 15817265    |
| GDNF        | 2668          | GDNF gene therapy shows decreased degeneration, decreased aggregations, and improved motor function. This contradicts other gene therapy study.                                             | 16751280    |
| GRIN2B      | 2904          | GRIN2B OE and CAG-150 KI double mutant showed increased striatal degeneration and volume loss; no change in rotarod but reduced body weight and less exploratory and locomotor behavior.    | 19279257    |
| HDAC1       | 3065          | Mouse knockout HDAC heterozygote showed no effect in mouse R6/2 model.                                                                                                                      | Unpublished |
| HDAC4       | 9759          | Heterozygotes of HDAC4 knockouts crossed to R6/2 mice led to improved motor/behavior and reduced aggregation.                                                                               | Unpublished |
| HDAC5       | 10014         | R6/2 crossed to HDAC5 KO showed no effect on HD outcomes.                                                                                                                                   | Unpublished |
| HDAC7       | 51564         | There is no improvement in a number of physiological or behavioral phenotypes in HDAC7 +/- crossed to R6/2.                                                                                 | 19484127    |
| HDAC9       | 9734          | Knockout crossed to R6/2 showed no effect in the mouse.                                                                                                                                     | Unpublished |
| HSF1        | 3297          | Active HSF-1 expressed in skeletal muscle of tg mouse, when crossed to R6/2 reversed muscle phenotypes including aggregation, and improved lifespan despite lack of CNS effects.            | 16051598    |
| HSPA1A      | 3303          | Deletion of both Hsp70.1 and Hsp70.3 in R6/2 worsened survival, body weight, motor functions, and increased the size but not number of inclusions.                                          | 19605647    |



|          |       |                                                                                                                                                                                                                                                                                   |          |
|----------|-------|-----------------------------------------------------------------------------------------------------------------------------------------------------------------------------------------------------------------------------------------------------------------------------------|----------|
| HSPA1A   | 3303  | Overexpression only decreases mhtt inclusions in R6/2.                                                                                                                                                                                                                            | 15115766 |
| HSPA2    | 3306  | Deletion of both Hsp70.1 and Hsp70.3 in R6/2 worsened survival, body weight, motor functions, and increased the size but not number of inclusions.                                                                                                                                | 19605647 |
| HSPA4    | 3308  | Hsp70 overexpressing transgenic crossed to R6/2 showed a slight delay in body weight loss but no effect in all other outcomes.                                                                                                                                                    | 12706247 |
| HSPB1    | 3315  | OE of Hsp27 has no effect on R6/2 phenotypes, oxidative stress or inclusions. Hsp27 can be activated by heat shock but remains inactive in the HD state in the double transgenic.                                                                                                 | 17360721 |
| HTT      | 3064  | HdhQ140 increased median and maximum lifespan of p53 KO with gender differences.                                                                                                                                                                                                  | 18242663 |
| HTT      | 3064  | In both mouse and cell culture HD models mHTT knockdown led to decreased aggregation; and in N171-82Q mice, improved stride length and rotarod performance.                                                                                                                       | 15811941 |
| HTT      | 3064  | siRNA against mhtt improved HD phenotypes in R6/2.                                                                                                                                                                                                                                | 16095740 |
| HTT      | 3064  | N571-htt-72Q-KR (non-Ac) in neuronal culture, in vivo, and in worms increased mhtt levels and increased toxicity compared to Ac-mhtt.                                                                                                                                             | 19345187 |
| ITPR1    | 3708  | AAV1-GFP-IC10 improved motor and MSN deficits in YAC128. Lenti-GFP-IC10 virus in YAC128 cultured MSNs stabilized Ca(2+) and reduced glutamate-induced apoptosis.                                                                                                                  | 19193873 |
| NOG      | 9241  | BDNF and Noggin together induced striatal neuronal regeneration, delayed motor impairment, and extended survival in R6/2 mice.                                                                                                                                                    | 17885687 |
| NOS1     | 4842  | -/- nNOS crossed to R6/1 worsened phenotypes (body weight, rotarod, clasping, survival) compared to control or to +/- nNOS crosses.                                                                                                                                               | 12020853 |
| NRTN     | 4902  | CERE-120 (AAV2-NTN) reduced motor deficits, and neuronal loss in striatum and cortex in N171-82Q.                                                                                                                                                                                 | 19150499 |
| OGG1     | 4968  | Oxidative lesions is age dependent and increases somatic expansion in R6/1 cells and neurons; age-dependent expansion is suppressed in OGG1 KO cross.                                                                                                                             | 17450122 |
| PARK2    | 5071  | Parkin +/- crossed to R6/1 were more akinetic; had fewer inclusions and a more TUNEL+ cells in striatum but not in hippocampus.                                                                                                                                                   | 19464273 |
| PPARGC1A | 10891 | PGC-1alpha knockout crossed to CAG140 KI HD model worsened HD phenotypes. Lentiviral expression of PGC-1alpha in striatum of R6/2 reduced neurodegeneration.                                                                                                                      | 17018277 |
| PRNP     | 5621  | Deletion of PrP had no effect on a variety of outcome measures in R6/2 except for a small improvement in rotarod from 6-12 wks; no effect in the N171-82Q model. Overexpressing PrP did not worsen the HD phenotypes.                                                             | 19901559 |
| PSME3    | 10197 | REG-gamma +/- crossed to R6/2 did not improve the HD phenotype.                                                                                                                                                                                                                   | 16311253 |
| SLC6A3   | 6531  | DAT KO crossed to Hdh92Q KI worsened locomotor and aggregation at 8 mo.                                                                                                                                                                                                           | 17065224 |
| SOD1     | 6647  | Overexpression had no effect on motor skills or lifespan.                                                                                                                                                                                                                         | 15081595 |
| SP1      | 6667  | RNAi KD of Sp1 reduces toxicity of 3-NP on mhtt PC12 cells. Sp1 +/- crossed to HD mice increased lifespan.                                                                                                                                                                        | 16595660 |
| STUB1    | 10273 | CHIP +/- crossed to N171-82Q worsened degeneration, aggregation, and motor/behavior. OE in cell culture and zebra fish decreased toxicity and aggregation.                                                                                                                        | 16207874 |
| TGM2     | 7052  | Cystamine improves motor behavior and lifespan in R6/2 model even when the transglutaminase gene is knocked out. This indicates that TGT is NOT the target of cystamine.                                                                                                          | 15896882 |
| TGM2     | 7052  | TGM2 KO crossed to R6/1 improved body weight loss, striatal degeneration, motor behavior, and lifespan; increased intranuclear inclusions.                                                                                                                                        | 12181738 |
| TGM2     | 7052  | TGM2 knockout crossed to R6/2 shows decreased degeneration, increased aggregation, improved rotarod performance and increased lifespan.                                                                                                                                           | 15606898 |
| TP53     | 7157  | In N171-htt 82, fly, and cell culture, reducing p53 reduced toxicity. P53 KO reduced degeneration and improved motor/behavior in HD mouse, including clasping, clockwise rotational behavior in open field, decrease in prepulse inhibition in the startle response, and rotarod. | 15996546 |
| TP53     | 7157  | p53 deficiency reduced mhtt expression in brain and testis, and increased mhtt aggregation in striatum.                                                                                                                                                                           | 16978870 |
| UBB      | 7314  | Expression of mhtt in UBB+1 mice showed more aggregates than in wildtype.                                                                                                                                                                                                         | 20005957 |
| PPID     | 5481  | KO of cyclophilin-D showed no alterations in body weight, survival, motor performances, grip strength, and no significant effect on the neuropathological features of R6/2 mice                                                                                                   | 20558522 |
| UBC      | 7316  | R6/2 crossed with Ubc +/- showed no effect on rotarod, grip strength, weight loss; but improved rearing and center-rearing activities.                                                                                                                                            | 19602042 |
